# Supplementary material for: Self-assembling short immunostimulatory duplex RNAs with broad spectrum antiviral activity
Source: PubMed Central journal article supplement — bioRxiv. 2021 Nov 22:2021.11.19.469183. Preprint. [Version 1] doi: 10.1101/2021.11.19.469183 (PMC8629196; doi:10.1101/2021.11.19.469183), 2021-11-22
Supplement: NIHPP2021.11.19.469183V1-supplement-1.pdf [file NIHPP2021.11.19.469183V1-supplement-1.pdf]

862

## Supplementary Data

863 **Self assembling short immunostimulatory duplex RNAs with broad spectrum antiviral**  
864 **activity**

865

866 Longlong Si<sup>1,#</sup>, Haiqing Bai<sup>1,#</sup>, Crystal Yuri Oh<sup>1</sup>, Tian Zhang<sup>4</sup>, Fan Hong<sup>1</sup>, Amanda Jiang<sup>1,3</sup>,  
867 Yongxin Ye<sup>5</sup>, Tristan X. Jordan<sup>6</sup>, James Logue<sup>7</sup>, Chaitra Belgur<sup>1</sup>, Atiq Nurani<sup>1</sup>, Wuji Cao<sup>1</sup>,  
868 Rachelle Prantil-Baun<sup>1</sup>, Steven P Gygi<sup>4</sup>, Rani K. Powers<sup>1</sup>, Matthew Frieman<sup>7</sup>, Benjamin R.  
869 tenOever<sup>6</sup>, and Donald E. Ingber<sup>1-3,\*</sup>

870

871 <sup>1</sup>Wyss Institute for Biologically Inspired Engineering, Harvard University, Boston, MA 02115,  
872 USA.

873 <sup>2</sup>Harvard John A. Paulson School of Engineering and Applied Sciences, Cambridge, MA 02139,  
874 USA.

875 <sup>3</sup>Vascular Biology Program and Department of Surgery, Boston Children's Hospital and Harvard  
876 Medical School, Boston, MA 02115, USA.

877 <sup>4</sup>Department of Cell Biology, Harvard Medical School, Boston, MA 02115, USA.

878 <sup>5</sup>Department of Genetics, Harvard Medical School, Boston, MA 02155, USA.

879 <sup>6</sup>Department of Microbiology, Icahn School of Medicine at Mount Sinai, New York, NY, USA.

880 <sup>7</sup>Department of Microbiology and Immunology, University of Maryland School of Medicine,  
881 Baltimore, MD 21201, USA

882

883

884 <sup>#</sup>These authors contribute equally to this work.

885 \*Corresponding Author: Donald E. Ingber, MD, PhD, Wyss Institute for Biologically Inspired  
886 Engineering at Harvard University, CLSB5, 3 Blackfan Circle, Boston MA 02115 (ph: 617-432-  
887 7044, fax: 617-432-7828; email: [don.ingber@wyss.harvard.edu](mailto:don.ingber@wyss.harvard.edu))

888

889

---



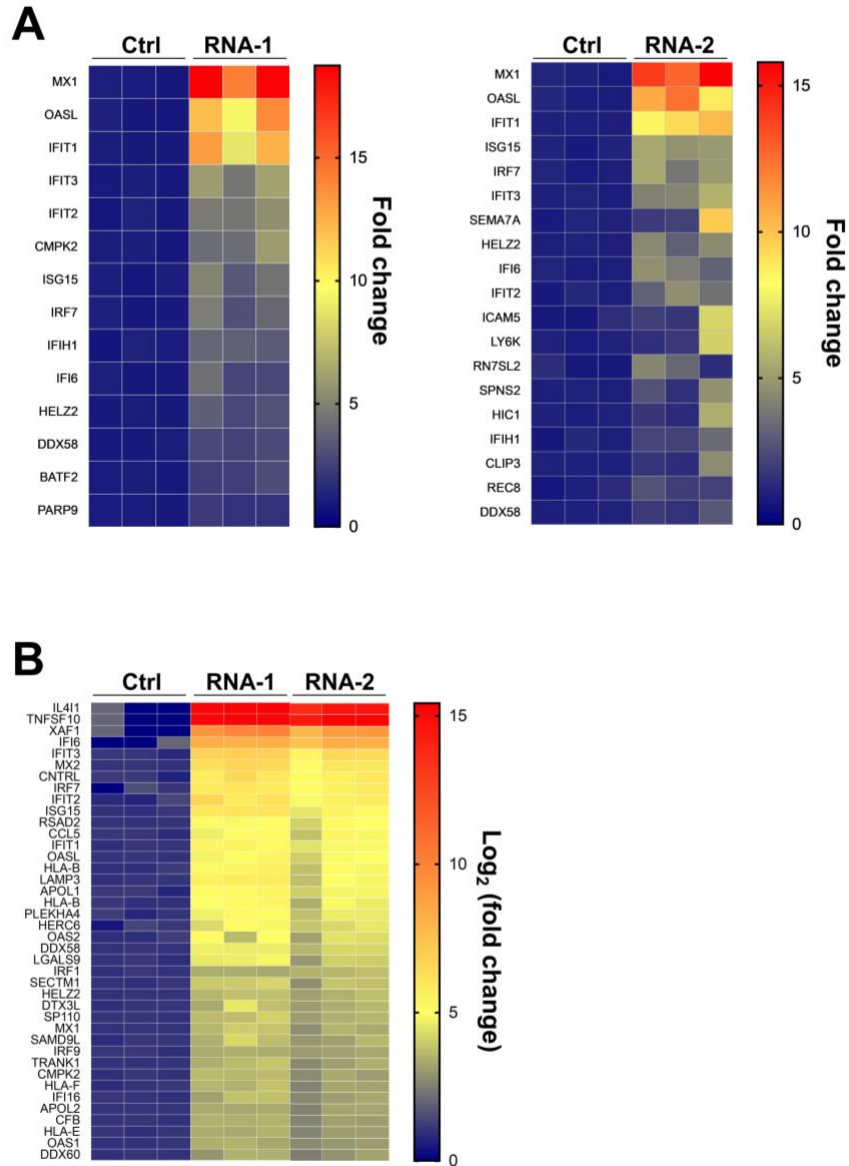

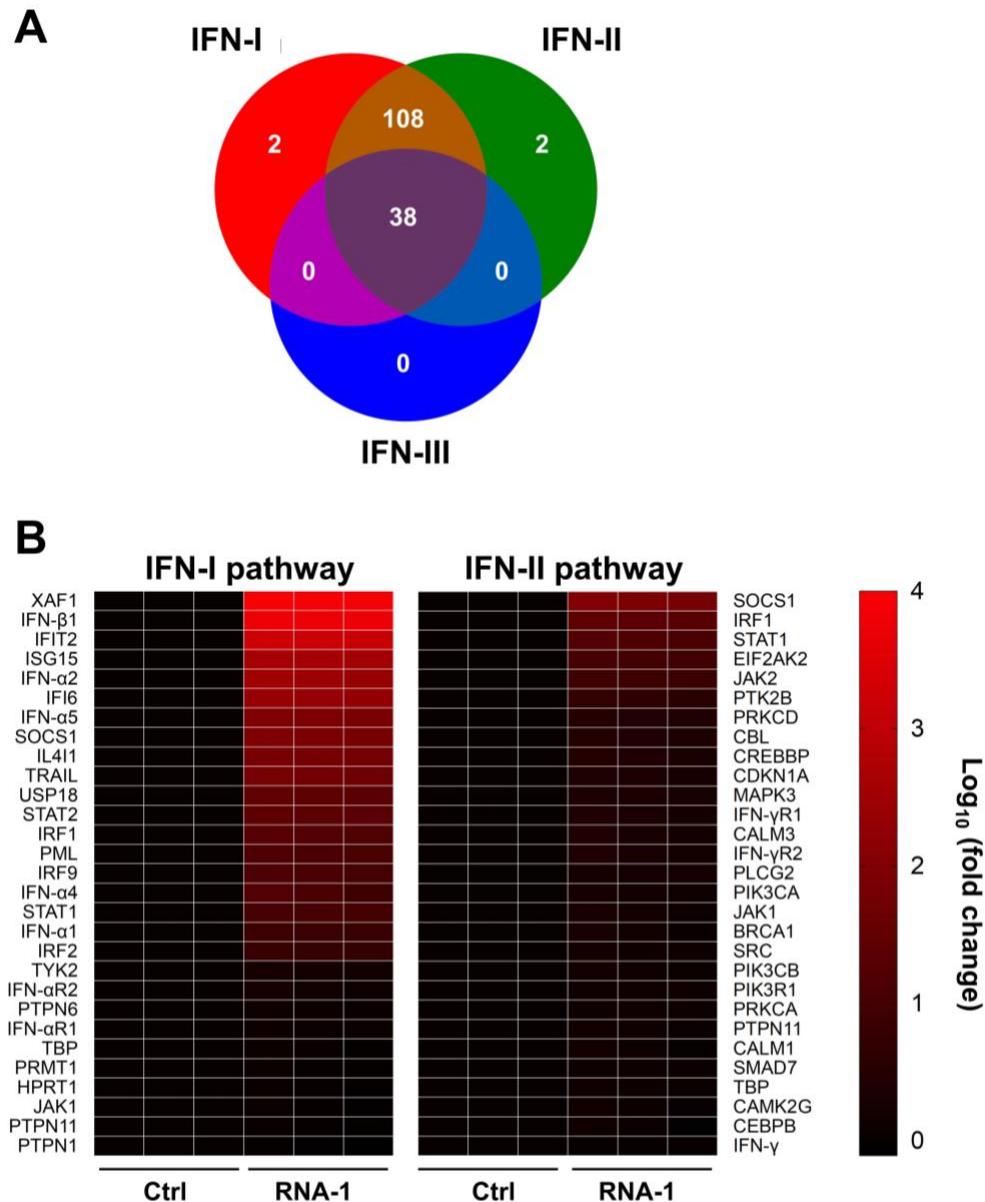

904

905 **Figure S3. RNA-induced gene expression associated with type I interferon pathway. (A)**

906 Venn diagram showing differentially expressed ISGs from TMT Mass Spec by RNA-1 belong to

907 type I or type II interferon stimulated genes. **(B)** Heat map of qPCR results showing RNA-I

908 preferentially activates type I interferon pathway. A549 cells were transfected with RNA-1 or

909 scrambled dsRNA control, collected at 48 hr and analyzed by qPCR (expression levels were

910 normalized to GAPDH; gene levels induced by the RNA control were set as 1; N = 3).

911

912

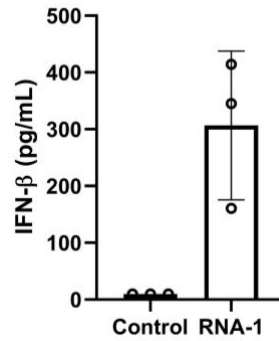

913

914 **Figure S4. The levels of IFN- $\beta$  protein induced by RNA-1.** A549 cells were transfected with  
915 RNA-1 (34 nM) for 48 h, and then supernatants were collected for detection of IFN- $\beta$  using  
916 ELISA. Scrambled RNA control NC-1 is used as negative (N = 3).

917

918

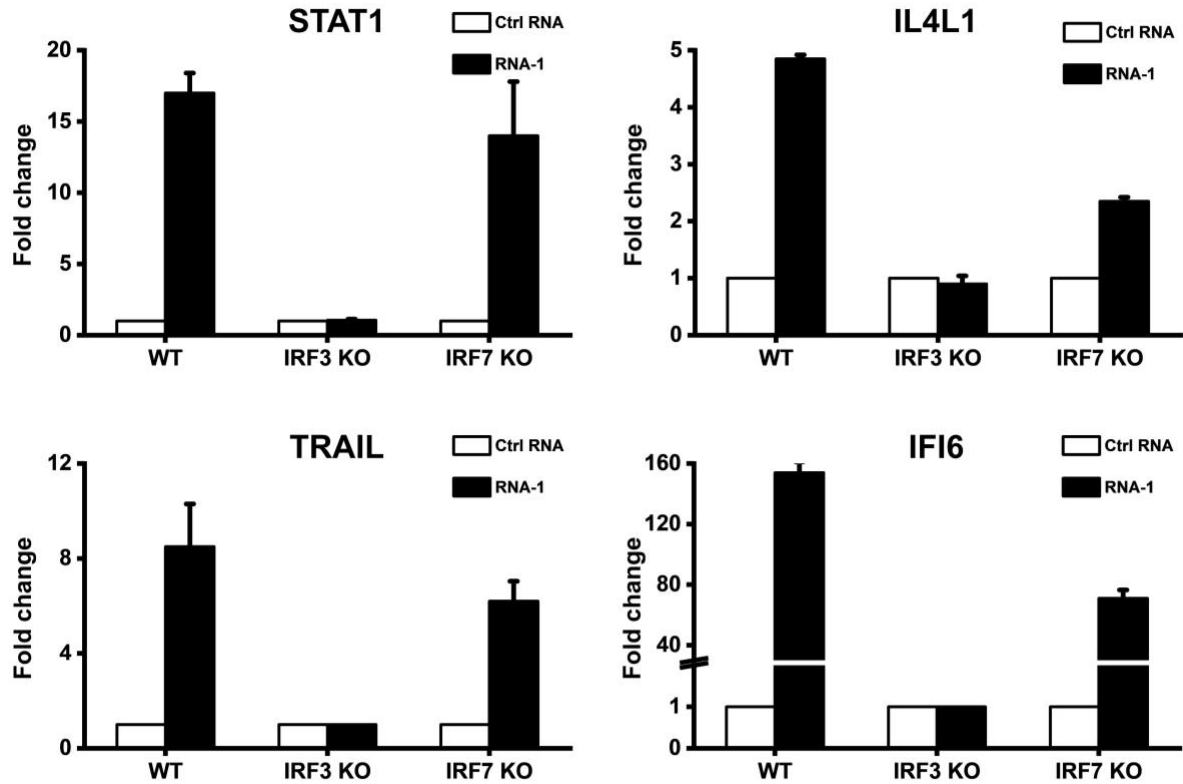

919

920 **Figure S5. IRF3 knockout abolished the ability of immunostimulatory RNAs to induce**  
921 **IFN-I pathway associated genes.** Wild-type (WT) HAP1 cells, IRF3 knockout HAP1 cells, or  
922 IRF7 knockout HAP1 cells were transfected with RNA-1 or a scrambled RNA control and  
923 STAT1, IL4L1, TRAIL, and IFI6 mRNA levels were quantified by qPCR at 48 h post transfection.  
924 Data are presented as fold change relative to RNA control (N = 3).

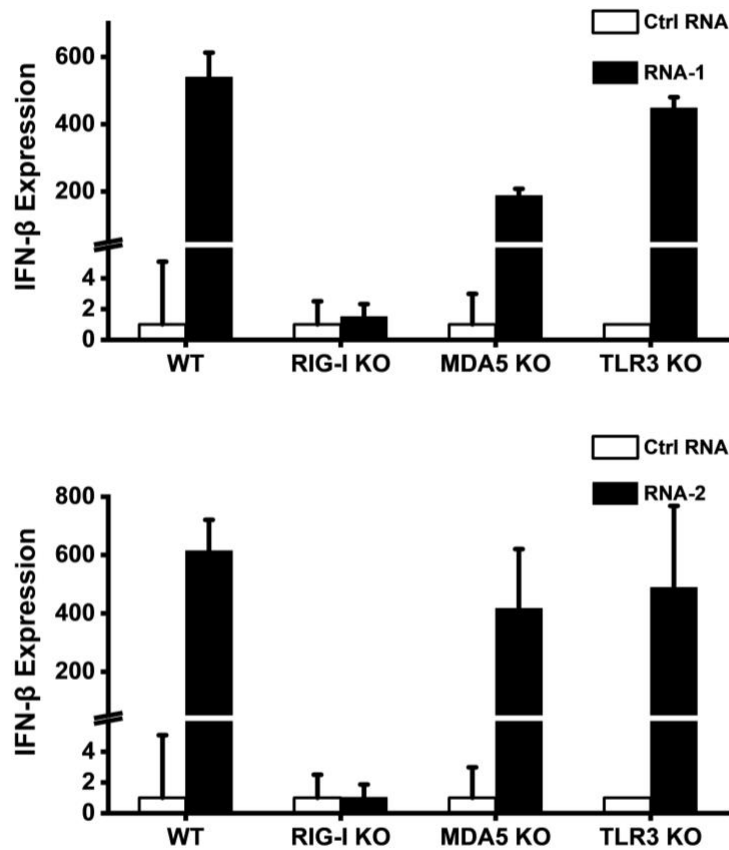

925

926 **Figure S6. RIG-I knockout abolished the induction effects of the immunostimulatory**  
927 **RNAs on IFN-β.** Wild-type (WT) A549-Dual cells, RIG-I knockout A549-Dual cells, MDA5  
928 knockout A549-Dual cells, or TLR3 knockout A549 cells were transfected with RNA-1, RNA-2,  
929 or a scramble RNA control and IFN-β mRNA levels were detected by Quanti-Luc assay in WT,  
930 RIG-I KO, and MDA5 KO A549-Dual cells or qPCR in TLR3 KO A549 cells at 48 h post  
931 transfection. Data are shown as fold change relative to the scrambled RNA control (N = 6).

932



933

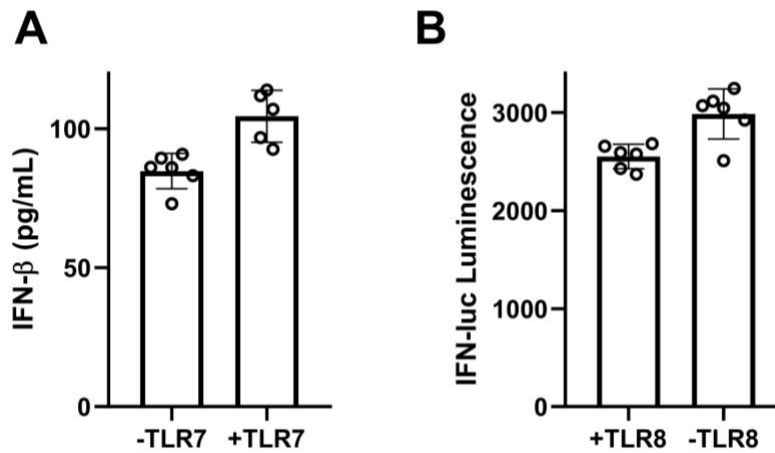

934

935 **Figure S7. TLR7/8 knockout or overexpression did not have effect on the**  
936 **immunostimulatory activity of RNA-1. (A)** Graph showing that the overexpression of TLR7 in  
937 HEK cells had no effect on production of IFN-β induced by RNA-1. **(B)** Graph showing that the  
938 knockout of TLR8 in THP1 cells had no effect on IFN production induced by RNA1. These cell  
939 lines are commercial and could be purchased from InvivoGen.

940

941

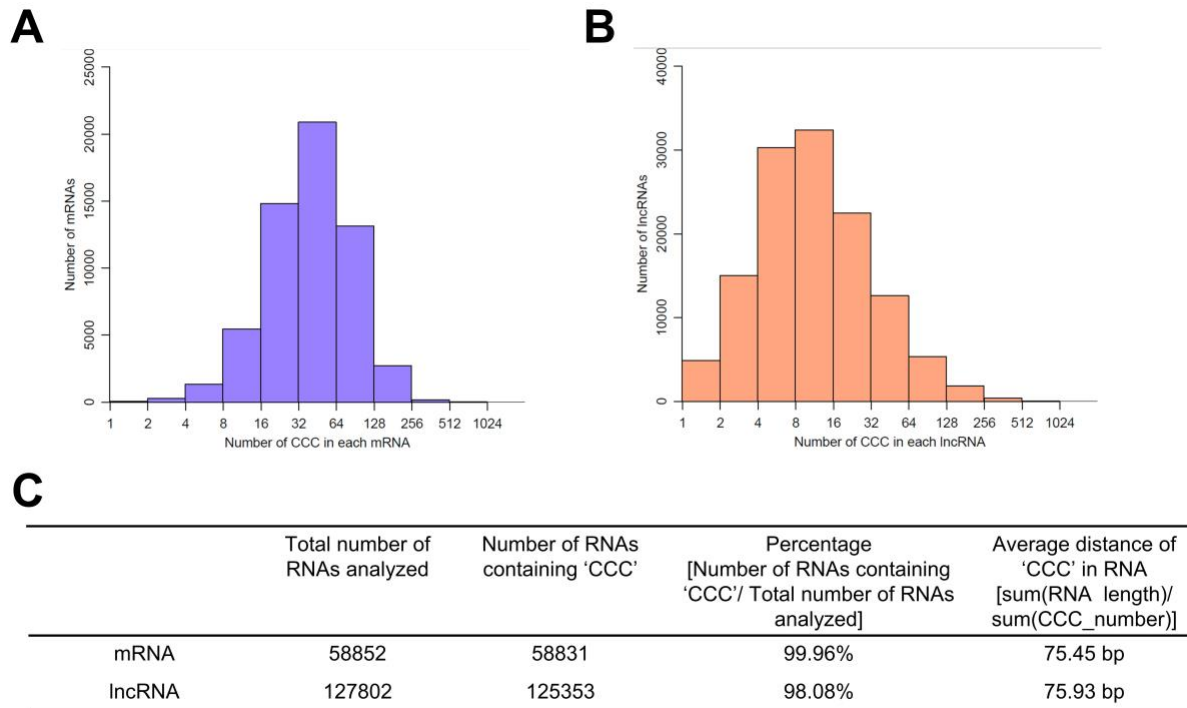

942

943 **Figure S8. 'CCC' motif is widely distributed in human genome.** (A) Graph showing the  
 944 distribution of the number of CCC sequences in human mRNAs (retrieved from UCSC hg38  
 945 refGene with prefix NM). (B) Graph showing the distribution of the number of CCC sequences in  
 946 human lncRNAs (retrieved from Incipedia). (C) Table showing the percentage of human mRNAs  
 947 and lncRNAs containing the CCC motif and their average density.

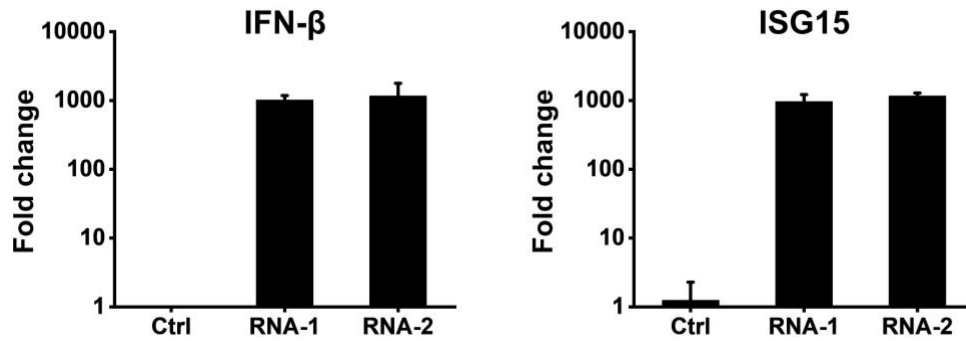

948

949 **Figure S9. Immunostimulatory RNA-mediated production of IFN in ACE2-overexpressing**  
950 **A549 cells.** IFN- $\beta$  and ISG15 levels were detected in cells transfected with RNA-1, RNA-2, or  
951 scramble dsRNA control by qPCR at 48 h post-transfection. The IFN- $\beta$  or ISG15 level induced  
952 by the scramble dsRNA control was set as 1. Data are shown as fold change relative to the  
953 control (N = 3).

954

955

956

957

958

959

960 **Table S1. Summary of characteristics of reported immunostimulatory RNAs.**

| <b>Characteristic</b>           | <b>Signaling pathway</b>  | <b>Cytokines</b>         |
|---------------------------------|---------------------------|--------------------------|
| 5'-UGUGU-3' motif               | Toll-like receptor (TLR)8 | IFN-alfa                 |
| 5'-GUCCUCAA-3' motif            | TLR7/8                    | IFN-alfa                 |
| GU or AU rich                   | TLR7/8                    | IFN-alfa, TNF-alfa       |
| Uracil repeats                  | TLR7                      | IFN-alfa, IL-6, TNF-alfa |
| Blunt ended dsRNA               | RIG-I                     | Type I IFN, p56          |
| 5'-triphosphate; 5'-diphosphate | RIG-I                     | IFN-alfa, IFN-beta       |
| MicroRNA-like siRNA             | TLR7/8                    | IFN-alfa, TNF-alfa       |
| Long dsRNA                      | MDA5                      | Type I IFN               |
| Long dsRNA                      | TLR3                      | Type I IFN               |
| Single stranded (ss)RNA         | TLR7                      | Type I IFN               |

961

962

963

964
